# Supplementary material for: Nicotinamide mononucleotide attenuates glucocorticoid-induced osteogenic inhibition by regulating the SIRT1/PGC-1α signaling pathway
Source: PubMed Central journal article supplement — Mol Med Rep. 2020 May 4;22(1):145–54. doi: 10.3892/mmr.2020.11116 (PMC7248519; doi:10.3892/mmr.2020.11116), 2020-05-04

Figure S1. SIRT1 was expressed mainly in the cytoplasm. (A) Immunofluorescence was used to detect SIRT1 protein expression in the cytoplasm or nucleus. Scale bar, 2  $\mu$ m. (B) Western blotting was used to confirm SIRT1 protein expression in the cytoplasm or nucleus. \*\*\* $P < 0.001$ . The experiments were performed  $\geq 3$  times. PCNA, proliferating cell nuclear antigen.

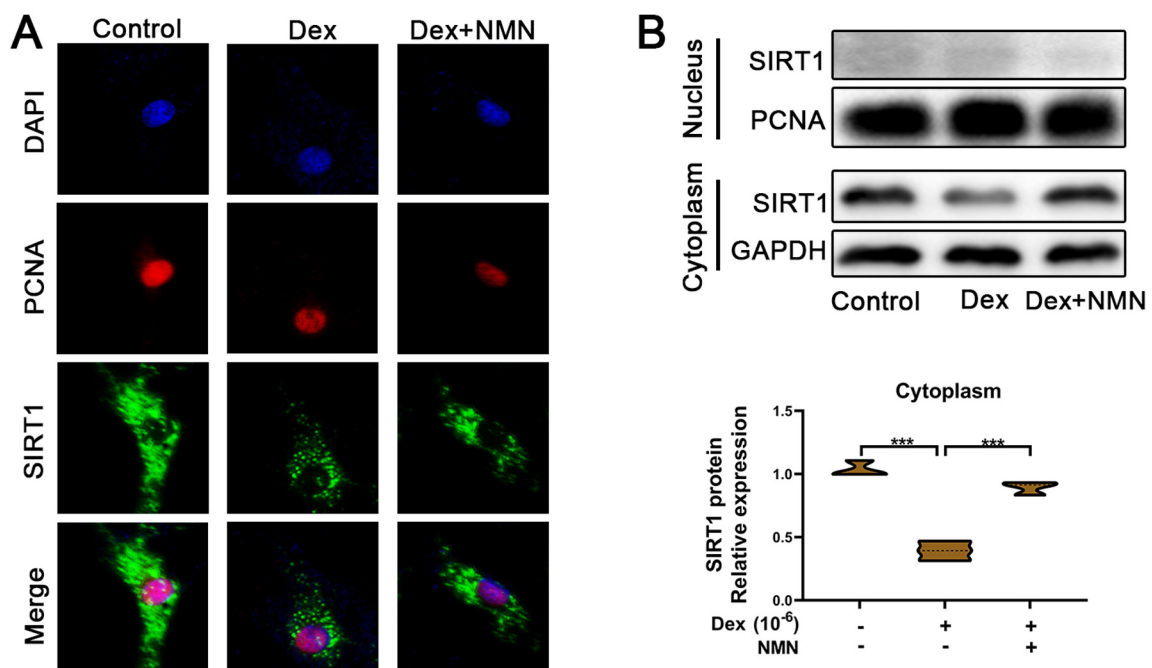

Supplement: Supplementary_Data.pdf [file Supplementary_Data.pdf]
